# Supplementary material for: Mechanism of action biomarkers predicting response to AKT inhibition in the I-SPY 2 breast cancer trial
Source: PubMed Central journal article supplement (PMC7532145; doi:10.1038/s41523-020-00189-2), 2020-10-02
Supplement: 41523_2020_189_MOESM1_ESM.pdf [file 41523_2020_189_MOESM1_ESM.pdf]

## Mechanism of action biomarkers predicting response to AKT inhibition in the I-SPY2 breast cancer trial

Denise M Wolf<sup>1\*</sup>, Christina Yau<sup>1\*</sup>, Julia Wulfkuhle<sup>2\*</sup>, Lamorna Brown-Swigart<sup>1</sup>, Mark Magbanua<sup>1</sup>, Nick O'Grady<sup>1</sup>, Gillian Hirst<sup>1</sup>, I-SPY 2 TRIAL Investigators, Smita Asare<sup>3</sup>, Debu Tripathy<sup>4</sup>, Don Berry<sup>5</sup>, Laura Esserman<sup>1</sup>, A. Jo Chien<sup>1</sup>, Emanuel F. Petricoin III<sup>2</sup>, Laura van 't Veer<sup>1</sup>

| Population as a whole with gene expression (n=150: 94 in MK2206, 56 in Ctr) |                         |                  |                                              |                       |                |                                  |                                                      | HER2+ subset (n=34 in MK2206)* |                  | TN subset (n=32 in MK2206)* |                  | HR+HER2- subset (n=28 in MK2206)* |                  |        |
|-----------------------------------------------------------------------------|-------------------------|------------------|----------------------------------------------|-----------------------|----------------|----------------------------------|------------------------------------------------------|--------------------------------|------------------|-----------------------------|------------------|-----------------------------------|------------------|--------|
| Genes                                                                       | MK2206 arm: OR/unit inc | MK2206 arm: LR p | MK2206 arm: LR p (adjusting for HR and HER2) | Cont arm: OR/unit inc | Cont arm: LR p | Biomarker x treatment int (LR p) | Biomarker x treatment int (adjusted for HR and HER2) | MK2206 arm: OR/unit inc        | MK2206 arm: LR p | MK2206 arm: OR/unit inc     | MK2206 arm: LR p | MK2206 arm: OR/unit inc           | MK2206 arm: LR p |        |
| AKT/MTOR signaling axis                                                     | AKT1                    | 0.949            | 0.803                                        | 0.855                 | 0.944          | 0.887                            | 0.967                                                | 0.899                          | 0.986            | 0.97                        | 0.586            | 0.175                             | 0.912            | 0.849  |
|                                                                             | EGFR                    | 1.23             | 0.305                                        | 1.02                  | 1.01           | 0.985                            | 0.66                                                 | 0.664                          | 1.02             | 0.949                       | 1.21             | 0.698                             | 0.884            | 0.806  |
|                                                                             | EGFR                    | 1.23             | 0.305                                        | 1.09                  | 1.01           | 0.985                            | 0.66                                                 | 0.664                          | 1.02             | 0.949                       | 1.21             | 0.698                             | 0.884            | 0.806  |
|                                                                             | ERBB2                   | 1.51             | 0.0464                                       | 1.15                  | 1.47           | 0.329                            | 0.964                                                | 0.927                          | 1.32             | 0.644                       | 1.17             | 0.836                             | 0.88             | 0.916  |
|                                                                             | ERBB3                   | 1.01             | 0.977                                        | 0.854                 | 0.596          | 0.155                            | 0.226                                                | 0.237                          | 1.02             | 0.963                       | 1.19             | 0.74                              | 1.27             | 0.648  |
|                                                                             | IGF1R                   | 0.628            | 0.0678                                       | 0.924                 | 0.779          | 0.522                            | 0.656                                                | 0.88                           | 0.259            | 0.0356                      | 2.03             | 0.2                               | 0.722            | 0.52   |
|                                                                             | MTOR                    | 0.905            | 0.652                                        | 1.33                  | 1.69           | 0.157                            | 0.144                                                | 0.213                          | 1.09             | 0.807                       | 0.747            | 0.462                             | 0.781            | 0.659  |
|                                                                             | NRG1                    | 1.37             | 0.153                                        | 1.2                   | 0.742          | 0.444                            | 0.182                                                | 0.17                           | 0.765            | 0.626                       | 1.79             | 0.0457                            | 0.166            | 0.0592 |
|                                                                             | PIK3CA                  | 1.15             | 0.481                                        | 1.14                  | 1.99           | 0.18                             | 0.428                                                | 0.267                          | 0.857            | 0.568                       | 2.62             | 0.0303                            | 1.18             | 0.782  |
|                                                                             | PTEN                    | 1.06             | 0.774                                        | 1.32                  | 1.03           | 0.952                            | 0.914                                                | 0.84                           | 0.917            | 0.821                       | 1.43             | 0.318                             | 1.08             | 0.89   |
| STMN1                                                                       | 1.28                    | 0.226            | 0.855                                        | 1.28                  | 0.552          | 0.982                            | 0.816                                                | 1.78                           | 0.155            | 1.04                        | 0.922            | 0.888                             | 0.823            |        |
| Phase 1b study genes                                                        | ALDH4A1                 | 1.03             | 0.898                                        | 0.962                 | 0.802          | 0.578                            | 0.619                                                | 0.441                          | 1.23             | 0.588                       | 0.443            | 0.0937                            | 1.3              | 0.643  |
|                                                                             | G3BP1                   | 0.663            | 0.0481                                       | 0.78                  | 0.979          | 0.963                            | 0.429                                                | 0.725                          | 0.611            | 0.151                       | 0.999            | 0.998                             | 0.692            | 0.479  |
|                                                                             | MIEF1                   | 1.2              | 0.381                                        | 1.08                  | 0.887          | 0.753                            | 0.491                                                | 0.436                          | 1.14             | 0.661                       | 0.54             | 0.185                             | 2.84             | 0.0892 |
|                                                                             | PHEX                    | 0.809            | 0.274                                        | 0.7                   | 0.795          | 0.681                            | 0.974                                                | 0.71                           | 0.608            | 0.122                       | 0.654            | 0.232                             | 0.894            | 0.827  |
|                                                                             | PRODH                   | 1.44             | 0.067                                        | 1.3                   | 1.04           | 0.921                            | 0.499                                                | 0.584                          | 1.39             | 0.287                       | 0.97             | 0.949                             | 1.43             | 0.662  |
|                                                                             | SELENBP1                | 0.614            | 0.0558                                       | 0.768                 | 0.629          | 0.147                            | 0.908                                                | 0.534                          | 0.668            | 0.411                       | 0.771            | 0.502                             | 0.52             | 0.409  |
|                                                                             | STARD3                  | 1.52             | 0.0427                                       | 1.15                  | 1.71           | 0.174                            | 0.785                                                | 0.553                          | 1.37             | 0.504                       | 0.131            | 0.15                              | 0.651            | 0.773  |
|                                                                             | TCTEX1D2                | 1.34             | 0.161                                        | 1.47                  | 0.831          | 0.65                             | 0.304                                                | 0.255                          | 1.05             | 0.907                       | 1.71             | 0.151                             | 1.68             | 0.265  |
|                                                                             | TM7SF2                  | 0.971            | 0.888                                        | 0.723                 | 0.444          | 0.0659                           | 0.117                                                | 0.313                          | 0.983            | 0.965                       | 0.363            | 0.0642                            | 0.564            | 0.487  |

**Supplementary Table 1.** pCR association analysis results for pre-specified mechanism-of-action genes, in the population as a whole and in receptor subsets. P-values < 0.05 are in bold face; red denotes markers where higher levels associate with pCR; and blue denotes markers where higher levels associate with non-response. \*The small size and/or low number of pCR in the control group within receptor subsets precluded analysis (Ctr for HER2+: 3/10 pCR; TN: 3/24 pCR; HR+HER2+: 3/22 pCR).

| Population as a whole with RPPA (n=138: 87 in MK2206, 51 in Ctr) |                                  |                        |                                                          |                                 |                   |                                           |                                                                     | HER2+ subset<br>(n=31 in MK2206)* |                     | TN subset<br>(n=29 in MK2206)* |                     | HR+HER2- subset<br>(n=27 in MK2206)* |                     |
|------------------------------------------------------------------|----------------------------------|------------------------|----------------------------------------------------------|---------------------------------|-------------------|-------------------------------------------|---------------------------------------------------------------------|-----------------------------------|---------------------|--------------------------------|---------------------|--------------------------------------|---------------------|
| AKT/MTOR signaling axis<br>phospho-proteins                      | MK2206<br>arm:<br>OR/unit<br>inc | MK2206<br>arm: LR<br>p | MK2206<br>arm: LR p<br>(adjusting<br>for HR and<br>HER2) | Cont<br>arm:<br>OR/uni<br>t inc | Cont arm:<br>LR p | Biomarker<br>x<br>treatment<br>int (LR p) | Biomarker<br>x treatment<br>int<br>(adjusted<br>for HR and<br>HER2) | MK2206<br>arm:<br>OR/unit inc     | MK2206<br>arm: LR p | MK2206<br>arm:<br>OR/unit inc  | MK2206<br>arm: LR p | MK2206<br>arm:<br>OR/unit inc        | MK2206<br>arm: LR p |
| 4EBP1.S65                                                        | 0.824                            | 0.581                  | 0.491                                                    | 0.96                            | 0.887             | 0.737                                     | 0.758                                                               | 2.55                              | 0.25                | 0.441                          | 0.148               | 0.891                                | 0.885               |
| AKT.S473                                                         | 0.747                            | 0.175                  | 0.196                                                    | 0.963                           | 0.952             | 0.719                                     | 0.737                                                               | 1.04                              | 0.904               | 0.147                          | 0.021               | 0.293                                | 0.19                |
| AKT.T308                                                         | 0.658                            | 0.0684                 | 0.064                                                    | 1.3                             | 0.814             | 0.561                                     | 0.524                                                               | 1.23                              | 0.696               | 0.125                          | 0.011               | 0.288                                | 0.193               |
| eIF4E.S209                                                       | 1.2                              | 0.407                  | 0.944                                                    | 0.863                           | 0.716             | 0.469                                     | 0.843                                                               | 1.29                              | 0.45                | 0.669                          | 0.3                 | 3.2                                  | 0.14                |
| eIF4G.S1108                                                      | 1.18                             | 0.465                  | 0.983                                                    | 1.34                            | 0.386             | 0.748                                     | 0.517                                                               | 2.22                              | 0.047               | 0.406                          | 0.0666              | 1.04                                 | 0.96                |
| ERBB2.total                                                      | 1.33                             | 0.166                  | 0.35                                                     | 1.84                            | 0.0996            | 0.442                                     | 0.422                                                               | 0.606                             | 0.333               | 0.37                           | 0.733               | 2.18                                 | 0.695               |
| ERBB2.Y1248                                                      | 1.77                             | 0.00904                | 0.186                                                    | 1.54                            | 0.222             | 0.741                                     | 0.652                                                               | 1.74                              | 0.0783              | 3.23E-05                       | 0.0773              | 0.0107                               | 0.512               |
| ERBB2.Y877                                                       | 1.29                             | 0.292                  | 0.446                                                    | 1.05                            | 0.892             | 0.622                                     | 0.549                                                               | 0.626                             | 0.22                | 2.66                           | 0.0496              | 1.68                                 | 0.369               |
| ERBB3.total                                                      | 1.4                              | 0.25                   | 0.524                                                    | 0.949                           | 0.863             | 0.349                                     | 0.671                                                               | 1.7                               | 0.287               | 0.596                          | 0.487               | 1.37                                 | 0.589               |
| Estrogen.Rec.alpha.total                                         | 0.59                             | 0.0365                 | 0.185                                                    | 0.865                           | 0.668             | 0.379                                     | 0.706                                                               | 1.15                              | 0.765               | 0.34                           | 0.0579              | 0.599                                | 0.265               |
| FOXO3a.S253                                                      | 1.38                             | 0.261                  | 0.274                                                    | 1.16                            | 0.623             | 0.688                                     | 0.491                                                               | 0.524                             | 0.243               | 5.21                           | 0.0126              | 1.24                                 | 0.693               |
| FOXO1.S256                                                       | 1.93                             | 0.163                  | 0.321                                                    | 0.74                            | 0.379             | 0.0991                                    | 0.14                                                                | 11.2                              | 0.0072              | 0.687                          | 0.709               | 0.616                                | 0.655               |
| FOXO1.T24.FOXO3a.T32                                             | 1.35                             | 0.125                  | 0.569                                                    | 1.47                            | 0.518             | 0.894                                     | 0.933                                                               | 2.9                               | 0.0258              | 0.749                          | 0.361               | 2.26                                 | 0.501               |
| GSK3aB.S21.S9                                                    | 1.31                             | 0.18                   | 0.17                                                     | 1.23                            | 0.653             | 0.908                                     | 0.872                                                               | 2.84                              | 0.00937             | 0.77                           | 0.524               | 1.09                                 | 0.825               |
| mTOR.S2448                                                       | 1.23                             | 0.346                  | 0.288                                                    | 1.18                            | 0.634             | 0.92                                      | 0.62                                                                | 3.84                              | 0.00425             | 0.39                           | 0.0379              | 1.82                                 | 0.166               |
| mTOR.total                                                       | 0.683                            | 0.148                  | 0.296                                                    | 1                               | 0.998             | 0.357                                     | 0.506                                                               | 1.17                              | 0.76                | 0.396                          | 0.0612              | 0.805                                | 0.708               |
| NFkB.p65.S536                                                    | 0.552                            | 0.118                  | 0.0604                                                   | 0.773                           | 0.439             | 0.537                                     | 0.386                                                               | 1.55                              | 0.533               | 0.126                          | 0.00327             | 0.571                                | 0.557               |
| p70S6K.T389                                                      | 1.16                             | 0.467                  | 0.675                                                    | 1.06                            | 0.904             | 0.852                                     | 0.743                                                               | 1.25                              | 0.393               | 0.249                          | 0.0867              | 2.33                                 | 0.386               |
| p70S6K.T412                                                      | 1.29                             | 0.294                  | 0.644                                                    | 1.01                            | 0.97              | 0.528                                     | 0.644                                                               | 1.55                              | 0.23                | 0.476                          | 0.155               | 2.25                                 | 0.231               |
| p90RSK.S380                                                      | 1.09                             | 0.742                  | 0.907                                                    | 0.881                           | 0.724             | 0.63                                      | 0.484                                                               | 1.76                              | 0.281               | 0.579                          | 0.259               | 1.23                                 | 0.702               |
| PI3K.p85.Y485.p55.Y199                                           | 1.24                             | 0.302                  | 0.792                                                    | 1.48                            | 0.323             | 0.701                                     | 0.704                                                               | 1.52                              | 0.185               | 0.319                          | 0.0394              | 1.26                                 | 0.7                 |
| S6RP.S240.S244                                                   | 1.42                             | 0.106                  | 0.432                                                    | 1.01                            | 0.973             | 0.43                                      | 0.357                                                               | 2.05                              | 0.036               | 0.267                          | 0.0956              | 1.18                                 | 0.835               |
| SHC.Y317                                                         | 1.67                             | 0.0172                 | 0.252                                                    | 1.95                            | 0.152             | 0.76                                      | 0.851                                                               | 1.41                              | 0.18                | 0.871                          | 0.898               | 2.11                                 | 0.758               |
| Tuberin.TSC2.Y1571                                               | 0.859                            | 0.529                  | 0.403                                                    | 1                               | 0.995             | 0.779                                     | 0.868                                                               | 3.19                              | 0.0434              | 0.14                           | 0.00607             | 0.77                                 | 0.76                |
| SGK.S78                                                          | 0.836                            | 0.508                  | 0.262                                                    | 1.15                            | 0.63              | 0.423                                     | 0.308                                                               | 1.01                              | 0.979               | 0.126                          | 0.00352             | 1.49                                 | 0.534               |
| Estrogen.Rec.alpha.S118                                          | 0.795                            | 0.432                  | 0.412                                                    | 0.963                           | 0.901             | 0.653                                     | 0.723                                                               | 1.78                              | 0.22                | 0.184                          | 0.00988             | 0.803                                | 0.735               |

**Supplementary Table 2.** pCR association analysis results for pre-specified RPPA endpoints, in the population as a whole and in receptor subsets. P-values < 0.05 are in bold face; red denotes markers where higher levels associate with pCR; and blue denotes markers where higher levels associate with non-response. \*The small size and/or low number of pCR in the control group within receptor subsets precluded analysis (Ctr for HER2+: 3/9 pCR; TN: 3/22 pCR; HR+HER2+: 3/20 pCR).

**A)**

| Category                                                  | Term                                            | Count | PValue   | Genes                                                                                                                                                                                                                                                                                                                                                                                                                                                                                                    | Fold Enrichment | Benjamini | FDR    |
|-----------------------------------------------------------|-------------------------------------------------|-------|----------|----------------------------------------------------------------------------------------------------------------------------------------------------------------------------------------------------------------------------------------------------------------------------------------------------------------------------------------------------------------------------------------------------------------------------------------------------------------------------------------------------------|-----------------|-----------|--------|
| <b>MK2206 response pathway enrichments - HER2+ subset</b> |                                                 |       |          |                                                                                                                                                                                                                                                                                                                                                                                                                                                                                                          |                 |           |        |
| GOTERM_BP_DIRECT                                          | GO:0002250~adaptive immune response             | 20    | 7.77E-07 | PIK3CG, GPR183, SIT1, CD1C, KLRK1, CD1B, TNFRSF17, CTSS, SLAMF7, CLEC10A, CD1E, TRAT1, PRKCB, BTK, BTLA, SH2D1A, CD79B, CD79A, CTSH, PAG1                                                                                                                                                                                                                                                                                                                                                                | 3.9259          | 0.0019    | 0.0014 |
| GOTERM_BP_DIRECT                                          | GO:0006955~immune response                      | 35    | 3.74E-06 | C7, GPR183, ENPP2, IFITM2, IFITM3, IL18, CD70, HLA-DMB, IGF1R, CCL23, CXCR5, CCL21, HLA-DOA, THBS1, APLN, LTB, CD27, CR2, LTBR, CMKLR1, IL1RN, CCL19, CTSS, CCL18, CD1E, IGSF6, CCR8, TNFSF10, CCR6, CCL14, CCR2, IRF8, CD79B, TNFAIP1, ADAMDEC1                                                                                                                                                                                                                                                         | 2.4152          | 0.0046    | 0.0066 |
| GOTERM_BP_DIRECT                                          | GO:0070098~chemokine-mediated signaling pathway | 13    | 4.86E-06 | CCR8, CCL23, CCL14, CCR6, CXCR5, CMKLR1, CXCR4, CCL21, CCR2, CCL19, XCL1, CCL18, CCL17                                                                                                                                                                                                                                                                                                                                                                                                                   | 5.3194          | 0.0040    | 0.0086 |
| GOTERM_BP_DIRECT                                          | GO:0007165~signal transduction                  | 70    | 5.42E-06 | GNA14, PPARG, FST, PDE3B, GJA1, FGF13, CD53, RASSF7, ARHGAP15, CD48, ANK1, PPP1R1A, PITPNC1, GKAP1, DLG5, PRKACB, APLN, NRG2, LTBR, PAG1, LTBR, SIT1, TNFRSF17, CLIC2, TRAT1, PLAUR, PRKCB, JUP, CD38, CCR6, PLEKH3, RIN1, PDE9A, AKAP8, INPP4A, EXT2, TRAF1, INPP1, OSTF1, PLCXD3, SPOCK2, KLRK1, CD70, SPOCK1, MDK, STAT6, IGF1R, TAGAP, CCL23, BCL11B, PDE1A, RASGRP2, HLA-DOA, TRAF4, PIK3R1, HPGDS, MRC1, PHB, DPYSL5, DRG2, SLAMF1, CCL18, TRIM55, P2RX4, LYVE1, TNFSF10, PNOC, CD79B, XCL1, GFRA3 | 1.7516          | 0.0033    | 0.0095 |
| GOTERM_BP_DIRECT                                          | GO:0002407~dendritic cell chemotaxis            | 7     | 1.44E-05 | PIK3CG, GPR183, CCR6, CXCR4, CCL21, CCR2, CCL19                                                                                                                                                                                                                                                                                                                                                                                                                                                          | 11.9625         | 0.0070    | 0.0253 |
| GOTERM_BP_DIRECT                                          | GO:0019722~calcium-mediated signaling           | 10    | 5.26E-05 | CCR6, CXCR4, NCALD, PLCG2, HTR2B, LRRK2, RCAN3, SELE, BTK, MCTP1                                                                                                                                                                                                                                                                                                                                                                                                                                         | 5.6965          | 0.0212    | 0.0925 |
| <b>MK2206 response pathway enrichments - TN subset</b>    |                                                 |       |          |                                                                                                                                                                                                                                                                                                                                                                                                                                                                                                          |                 |           |        |
| REACTOME_PATHWAY                                          | REACT_7970:Telomere Maintenance                 | 14    | 5.14E-06 | HIST1H2AC, HIST1H2BB, HIST1H2BC, HIST1H2BD, HIST1H2BE, HIST1H2BG, POLE, HIST1H2BH, HIST1H2BO, RFC3, HIST1H2BM, HIST1H2BK, HIST1H2BL, HIST1H2BI, PRIM2, HIST1H2AK, HIST1H2AJ                                                                                                                                                                                                                                                                                                                              | 4.6168          | 0.0003    | 0.0051 |
| GOTERM_BP_FAT                                             | GO:0006325~chromatin organization               | 41    | 3.15E-05 | ING5, MORF4L1, SUPT3H, HIST1H2AC, HP1BP3, SETD1A, VPS72, TSPYL1, HIST1H2BO, CHD8, HIST1H2BM, CHD7, HIST1H2BK, PRMT7, HIST1H2BL, HIST1H2BI, GPX4, PBRM1, ACTL6A, KDM5C, CHD3, SETDB1, HIST1H2BB, HIST1H2BC, HIST1H2BD, HIST1H2BE, C11ORF30, HIST1H2BG, HIST1H2BH, ARID1A, BANP, ARID1B, TAF6L, SUV39H2, DOT1L, RNF8, TAF10, SAP130, SMARCC2, HIST1H2AK, RUVBL1, HIST1H2AJ, RNF20, RNF40                                                                                                                   | 2.0156          | 0.0844    | 0.0563 |

**B) MK2206 arm: HER2+ subset**

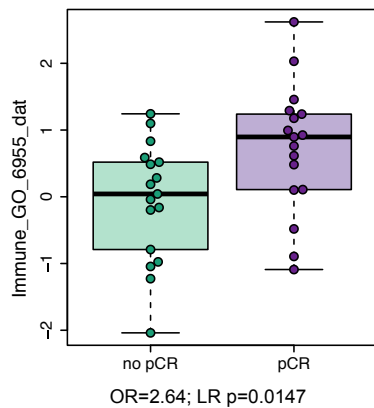

**C) MK2206 arm: HER2+ subset**

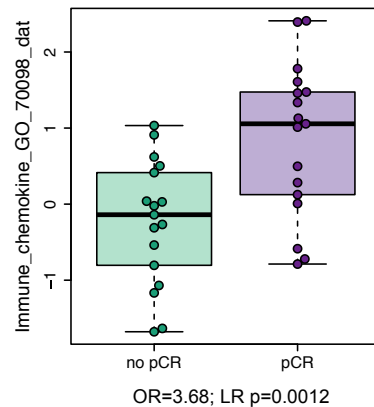

**D) MK2206 arm: TN subset**

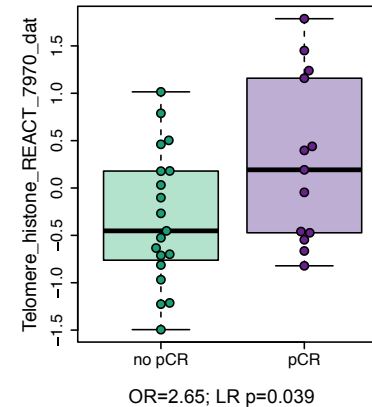

**Supplementary Figure 1.** Whole genome exploratory pathway enrichment analysis of responders within the HER2+ and TN patient subsets, respectively, in the MK2206 arm. A) Pathway enrichment table of genes associated with pCR in the MK2206 arm using DAVID, top hits, for HER2+ patients (top) and TN patients (bottom). Box plots in (B) and (C) show the mean expression level of genes in the top two enriched (immune) pathways in pCR vs. non-pCR within the HER2+ subset. D) Box plot showing the mean expression level of genes in the top enriched (telomere maintenance/histone) pathway in pCR vs. non-pCR patients within the TN subset.

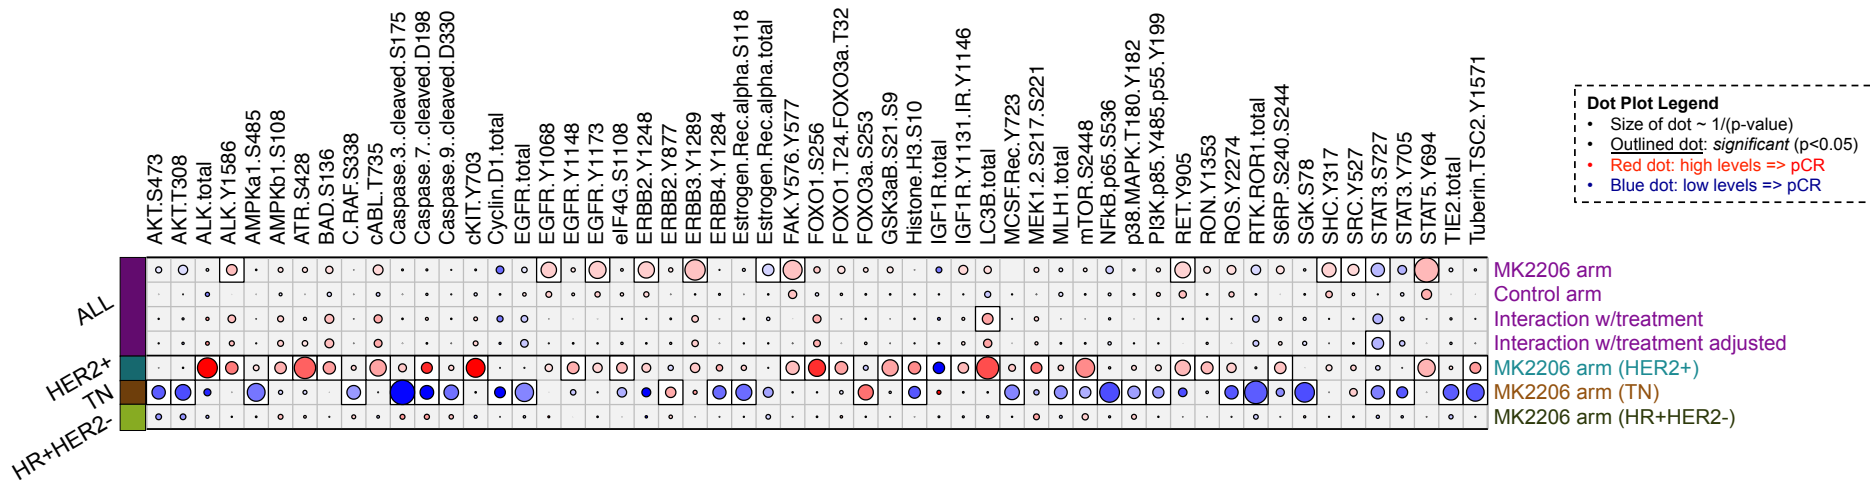

**Supplementary Figure 2.** Exploratory analysis of 118-endpoint RPPA dataset (115/118 with sufficient data for analysis). This association dot-plot shows the level and direction of association between each protein endpoint (column) and pCR in the MK2206 arm in patient groups as labeled (rows from top to bottom): all patients, HER2+, TN, and HR+HER2-. Key=red/blue dot indicates higher/lower levels ~ pCR; size of dot ~ strength of association (1/p), with dark outline indicating p < 0.05. Only endpoints (columns) with at least one association with (uncorrected) p < 0.05 are shown.

## Supplementary Acknowledgement

We would like to acknowledge the following investigators, staff and sites for their contributions to the I-SPY 2 TRIAL during the period patients were being randomized to MK2206:

Note: Names in bold are site principal investigators, and names that appear in brackets no longer reside at that specific institution.

**Liu, M.**<sup>6</sup>, Dillis, C.<sup>6</sup>, Donnelly, R.<sup>6</sup>, Harrington, T.<sup>6</sup>, Isaacs, C.<sup>6</sup>, Kallakury, B.<sup>6</sup>, Lynce, F.<sup>6</sup>, Oppong, B.<sup>6</sup>, Pohlmann, P.<sup>6</sup>, Tousimis, E.<sup>6</sup>, Warren, R.<sup>6</sup>, Willey, S.<sup>6</sup>, Wong, J.<sup>6</sup>, Zeck, J.<sup>6</sup>, **Albain, K.**<sup>7</sup>, Bartolotta, M.<sup>7</sup>, Bova, D.<sup>7</sup>, Brooks, C.<sup>7</sup>, Busby, B.<sup>7</sup>, Czaplicki, K.<sup>7</sup>, Duan, X.<sup>7</sup>, Gamez, R.<sup>7</sup>, Ganesh, K.<sup>7</sup>, Gaynor, E.<sup>7</sup>, Godellas, C.<sup>7</sup>, Grace-Louthen, C.<sup>7</sup>, Kuritza, T.<sup>7</sup>, Lo, S.<sup>7</sup>, Nagamine, A.<sup>7</sup>, Perez, C.<sup>7</sup>, Robinson, P.<sup>7</sup>, Rosi, D.<sup>7</sup>, Vaince, F.<sup>7</sup>, Ward, K.<sup>7</sup>, Choquette, K.<sup>8</sup>, **Edmiston, K.**<sup>8</sup>, Gallimore, H.<sup>8</sup>, McGovern, J.<sup>8</sup>, Mokarem, K.<sup>8</sup>, Pajaniappan, M.<sup>8</sup>, Rassulova, S.<sup>8</sup>, Scott, K.<sup>8</sup>, Sherwood, K.<sup>8</sup>, Wright, J.<sup>8</sup>, Anderson, K.<sup>9</sup>, Gray, R.<sup>9</sup>, Myers, S.<sup>9</sup>, **Northfelt, D.**<sup>9</sup>, Pockaj, B.<sup>9</sup>, Roedig, J.<sup>9</sup>, Wasif, N.<sup>9</sup>, Arens, A.<sup>10</sup>, **Boughey, J.**<sup>10</sup>, Brandt, K.<sup>10</sup>, Carroll, J.<sup>10</sup>, Chen, B.<sup>10</sup>, Connors, A.<sup>10</sup>, Degnim, A.<sup>10</sup>, Farley, D.<sup>10</sup>, Greenlee, S.<sup>10</sup>, Haddad, T.<sup>10</sup>, Hieken, T.<sup>10</sup>, Hobday, T.<sup>10</sup>, Jakub, J.<sup>10</sup>, Liberte, L.<sup>10</sup>, Liu, M.<sup>10</sup>, Loprinzi, C.<sup>10</sup>, Menard, L.<sup>10</sup>, Moe, M.<sup>10</sup>, Moynihan, T.<sup>10</sup>, O'Sullivan, C.<sup>10</sup>, Olson, E.<sup>10</sup>, Peethambaram, P.<sup>10</sup>, Ruddy, K.<sup>10</sup>, Russell, B.<sup>10</sup>, Rynearson, A.<sup>10</sup>, Smith, D.<sup>10</sup>, Visscher, D.<sup>10</sup>, Windish, A.<sup>10</sup>, Bengtson, H.<sup>11</sup>, Bucher, J.<sup>11</sup>, **Chui, S.**<sup>11</sup>, Gilbert-Ghormley, B.<sup>11</sup>, Hampton, R.<sup>11</sup>, Kemmer, K.<sup>11</sup>, Kurdyla, D.<sup>11</sup>, Nauman, D.<sup>11</sup>, Spear, J.<sup>11</sup>, Wilson, A.<sup>11</sup>, Beatty, D.<sup>12</sup>, Dawson, P.<sup>12</sup>, Ellis, E.<sup>12</sup>, Fer, M.<sup>12</sup>, Hanson, J.<sup>12</sup>, Goetz, M.<sup>12</sup>, Haddad, T.<sup>12</sup>, Iriarte, D.<sup>12</sup>, **Kaplan, H.**<sup>12</sup>, Porter, B.<sup>12</sup>, Rinn, K.<sup>12</sup>, Thomas, H.<sup>12</sup>, Thornton, S.<sup>12</sup>, Tickman, R.<sup>12</sup>, Varghis, N.<sup>12</sup>, Caterinichia, V.<sup>13</sup>, Delos Santos, J.<sup>13</sup>, Falkson, C.<sup>13</sup>, **Forero, A.**<sup>13</sup>, Krontiras, H.<sup>13</sup>, Vaklavas, C.<sup>13</sup>, Wei, S.<sup>13</sup>, Bauland, A.<sup>14</sup>, Inclan, L.<sup>14</sup>, Lewallen, D.<sup>14</sup>, Powell, A.<sup>14</sup>, Roney, C.<sup>14</sup>, Schmidt, K.<sup>14</sup>, **Viscusi, R.**<sup>14</sup>, Wright, H.<sup>14</sup>, Blair, S.<sup>15</sup>, Boles, S.<sup>15</sup>, Bykowski, J.<sup>15</sup>, Datnow, B.<sup>15</sup>, Densley, L.<sup>15</sup>, Eghtedari, M.<sup>15</sup>, Genna, V.<sup>15</sup>, Hasteh, F.<sup>15</sup>, Helsten, T.<sup>15</sup>, Kormanik, P.<sup>15</sup>, Ojeda- Fournier, H.<sup>15</sup>, Onyeacholem, I.<sup>15</sup>, Parker, B.<sup>15</sup>, Podsada, K.<sup>15</sup>, Schwab, R.<sup>15</sup>, **Wallace, A.**<sup>15</sup>, Yashar, C.<sup>15</sup>, Alvarado, M.<sup>1</sup>, Au, A.<sup>1</sup>, Balassanian, R.<sup>1</sup>, Benz, C.<sup>1</sup>, (Buxton, M.)<sup>1</sup>, Chen, Y.<sup>1</sup>, **Chien, J.**<sup>1</sup>, D'Andrea, C.<sup>1</sup>, (Davis, S.)<sup>1</sup>, Esserman, L.<sup>1</sup>, Ewing, C.<sup>1</sup>, Goga, A.<sup>1</sup>, Hirst, G.<sup>1</sup>, Hwang, M.<sup>1</sup>, Hylton, N.<sup>1</sup>, Joe, B.<sup>1</sup>, (Lyandres, J.)<sup>1</sup>, Kadafour, M.<sup>1</sup>, Krings, G.<sup>1</sup>, Melisko, M.<sup>1</sup>, Moasser, M.<sup>1</sup>, Ngo, Z.<sup>1</sup>, Park, J.<sup>1</sup>, Price, E.<sup>1</sup>, Rugo, H.<sup>1</sup>, van't Veer, L.<sup>1</sup>, Wolf, D.<sup>1</sup>, Wong, J.<sup>1</sup>, Yau, C.<sup>1</sup>, Abe, H.<sup>16</sup>, Jaskowiak, N.<sup>16</sup>, **Nanda, R.**<sup>16</sup>, Olopade, F.<sup>16</sup>, Schacht, D.<sup>16</sup>, Borges, V.<sup>17</sup>, Colvin, T.<sup>17</sup>, Diamond, J.<sup>17</sup>, **Elias, A.**<sup>17</sup>, Finlayson, C.<sup>17</sup>, Fisher, C.<sup>17</sup>, Hardesty, L.<sup>17</sup>, Kabos, P.<sup>17</sup>, Kounalakis, N.<sup>17</sup>, Mayordomo, J.<sup>17</sup>, McSpadden, T.<sup>17</sup>, Murphy, C.<sup>17</sup>, Rabinovitch, R.<sup>17</sup>, Sams, S.<sup>17</sup>, Shagisultanova, E.<sup>17</sup>, Beckwith, H.<sup>18</sup>, Blaes, A.<sup>18</sup>, Emory, T.<sup>18</sup>, (Haddad, T.)<sup>18</sup>, Hui, J.<sup>18</sup>, Klein, M.<sup>18</sup>, Kuehn-Hajder, J.<sup>18</sup>, Nelson, M.<sup>18</sup>, Potter, D.<sup>18</sup>, Tuttle, T.<sup>18</sup>, **Yee, D.**<sup>18</sup>, Zera, R.<sup>18</sup>, Bayne, L.<sup>19</sup>, Bradbury, A.<sup>19</sup>, Clark, A.<sup>19</sup>, **DeMichele, A.**<sup>19</sup>, Domchek, S.<sup>19</sup>, Fisher, C.<sup>19</sup>, Fox, K.<sup>19</sup>, Frazee, D.<sup>19</sup>, Lackaye, M.<sup>19</sup>, Matro, J.<sup>19</sup>, McDonald, E.<sup>19</sup>, Rosen, M.<sup>19</sup>, Shah, P.<sup>19</sup>, Tchou, J.<sup>19</sup>, Volpe, M.<sup>19</sup>, Alvarez, R.<sup>4</sup>, Barcenas, C.<sup>4</sup>, Booser, D.<sup>4</sup>, Brewster, A.<sup>4</sup>, Brown, P.<sup>4</sup>, **Gonzalez-Angulo, A.**<sup>4</sup>, Ibrahim, N.<sup>4</sup>, Karuturi, M.<sup>4</sup>, Koenig, K.<sup>4</sup>, **Moulder, S.**<sup>4</sup>, Murray, J.<sup>4</sup>, Murthy, R.<sup>4</sup>, Puzstai, L.<sup>4</sup>, Saigal, B.<sup>4</sup>, Symmans, W.<sup>4</sup>, Tripathy, D.<sup>4</sup>, Theriault, R.<sup>4</sup>, Ueno, N.<sup>4</sup>, Valero, V.<sup>4</sup>, Brown, M.<sup>20</sup>, Carranza, M.<sup>20</sup>, Flores, Y.<sup>20</sup>, Lang, J.<sup>20</sup>, Luna, A.<sup>20</sup>, Perez, N.<sup>20</sup>, Watkins, K.<sup>20</sup>, Armstrong, S.<sup>21</sup>, Boyd, C.<sup>21</sup>, Chen, L.<sup>21</sup>, Clark, V.<sup>21</sup>, Frankel, A.<sup>21</sup>, **Euhus, D.**<sup>21</sup>, Froehlich, T.<sup>21</sup>, Goudreau, S.<sup>21</sup>, Haley, B.<sup>21</sup>, Harker-Murray, A.<sup>21</sup>, Klemow, D.<sup>21</sup>, Leitch, A.<sup>21</sup>, Leon, R.<sup>21</sup>, Li, H.<sup>21</sup>, Morgan, T.<sup>21</sup>, Qureshi, N.<sup>21</sup>, Rao, R.<sup>21</sup>, Reeves, M.<sup>21</sup>, Rivers, A.<sup>21</sup>, Sadeghi, N.<sup>21</sup>, Seiler, S.<sup>21</sup>, Staves, B.<sup>21</sup>, Tagoe, V.<sup>21</sup>, Thomas, G.<sup>21</sup>, Tripathy, D.<sup>21</sup>, Unni, N.<sup>21</sup>, Weyandt, S.<sup>21</sup>, Wooldridge, R.<sup>21</sup>, Zuckerman, J.<sup>21</sup>, **Korde, L.**<sup>22</sup>, Griffin, M.<sup>22</sup>, Butler, B.<sup>22</sup>, Cundy, A.<sup>22</sup>, Rubinstein, L.<sup>22</sup>, Hixson, C.<sup>22</sup>

<sup>6</sup>Georgetown University, Washington, DC; <sup>7</sup>Loyola University Chicago Medical Center, Chicago, IL; <sup>8</sup>Inova Fairfax Hospital, Falls Church, VA; <sup>9</sup>Mayo Clinic, AZ; <sup>10</sup>Mayo Clinic, Rochester, MN; <sup>11</sup>Oregon Health and Science University, Portland, OR; <sup>12</sup>Swedish Cancer Institute, Seattle, WA; <sup>13</sup>University of Alabama, Birmingham, AL; <sup>14</sup>University of Arizona, Tucson, AZ; <sup>15</sup>University of California, San Diego, La Jolla, CA; <sup>16</sup>University of Chicago, Chicago, IL; <sup>17</sup>University of Colorado, Denver, CO; <sup>18</sup>University of Minnesota, Minneapolis, MN; <sup>19</sup>University of Pennsylvania, Philadelphia, PA; <sup>20</sup>University of Southern California, Los Angeles, CA; <sup>21</sup>University of Texas Southwestern Medical Center, Dallas, Texas; <sup>22</sup>University of Washington, Seattle, WA.
